# Supplementary material
Source: PubMed Central journal article supplement (PMC7523707)
Supplement: NIHMS1630863-supplement-1.pdf [file NIHMS1630863-supplement-1.pdf]

## Appendix

**Table S1**

Data Collection

| Data                                                        | Year | Source                                                                     |
|-------------------------------------------------------------|------|----------------------------------------------------------------------------|
| U.S. major cities boundary                                  | 2019 | U.S. Centers for Disease Control and Prevention 500 Cities Program         |
| U.S. COVID-19 data                                          | 2020 | New York Times                                                             |
| Exposure indices                                            | 2020 | PlaceIQ Movement Data                                                      |
| Population estimates by age, sex, race, and Hispanic origin | 2019 | U.S. Census Bureau                                                         |
| Life expectancy                                             | 2015 | U.S. Small-area Life Expectancy Estimates Project                          |
| Unemployment rate                                           | 2018 | U.S. Bureau of Labor Statistics, Local Area Unemployment Statistics (LAUS) |
| Median household income                                     | 2018 | Census Bureau, Small Area Income and Poverty Estimates (SAIPE) Program     |
| County business patterns                                    | 2020 | U.S. Census Bureau                                                         |
| County boundary                                             | 2017 | U.S. Census Bureau TIGER/Line Shapefile                                    |
| Education attainment                                        | 2018 | American Community Survey 5-year average county-level estimates            |
